# Supplementary material
Source: PubMed Central journal article supplement (PMC7448591)

## Supplemental Figures Zeeuw van der Laan et al.

**Supplementary Figure 1. Confirmation of antibody-deglycosylation.** SDS-PAGE (panel A) and mass spectrometry analysis (panel B) of deglycosylated 34-1-2S and SF1.1.10. Untreated antibodies are used as controls.

**Supplementary Figure 2. Confirmation of Fab-fragment generation.** Non-reducing SDS-PAGE demonstrating Fab fragment sizes of 34-1-2S and SF1.1.10. Full-length (untreated) antibodies are used as controls.

**Supplementary Figure 3. Deglycosylated antibody-binding to murine FcγRs.** Binding of deglycosylated 34-1-2S, SF1.1.10 and AF6-88.5.5.3 to murine FcγRI, FcγRIIb, FcγRIII, and FcγRIV as investigated using SPR. Dashed lines indicate binding of untreated antibodies (from Figure 4).

**Supplementary Figure 4. Antibody-Fab fragmentation binding to murine FcγRs.** Fab-fragment binding of 34-1-2S, SF1.1.10 and AF6-88.5.5.3 to murine FcγRI, FcγRIIb, FcγRIII, and FcγRIV as investigated using SPR.

**Supplementary Figure 5. Mass spectrometry readout example of antibody glycopeptide structure.**

# Supp. Fig. 1

## A

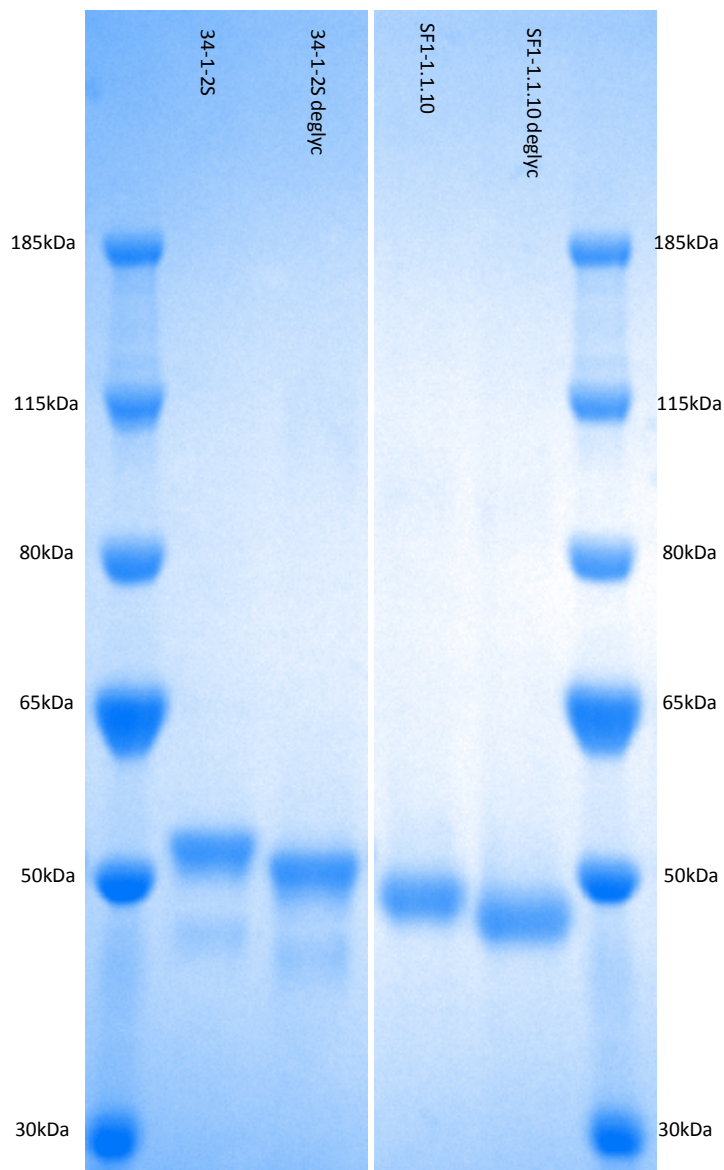

## B

| Fc-deglycosylation (%) | 34-1-2S | Deglycosylated 34-1-2S |
|------------------------|---------|------------------------|
| DeGlyc - GlcNAc + Fuc  | 0.02    | 93.16                  |

  

| Fc-deglycosylation (%) | SF1.1.10 | Deglycosylated SF1.1.10 |
|------------------------|----------|-------------------------|
| DeGlyc - GlcNAc + Fuc  | 0.27     | 89.86                   |

Supp. Fig. 2

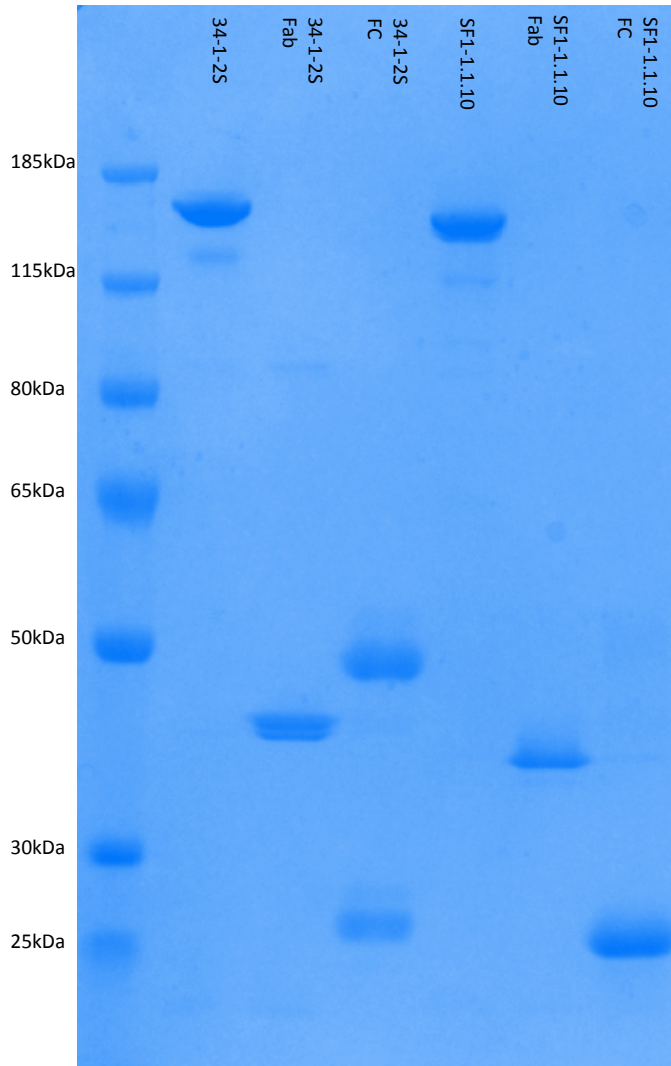

Supp. Fig. 3

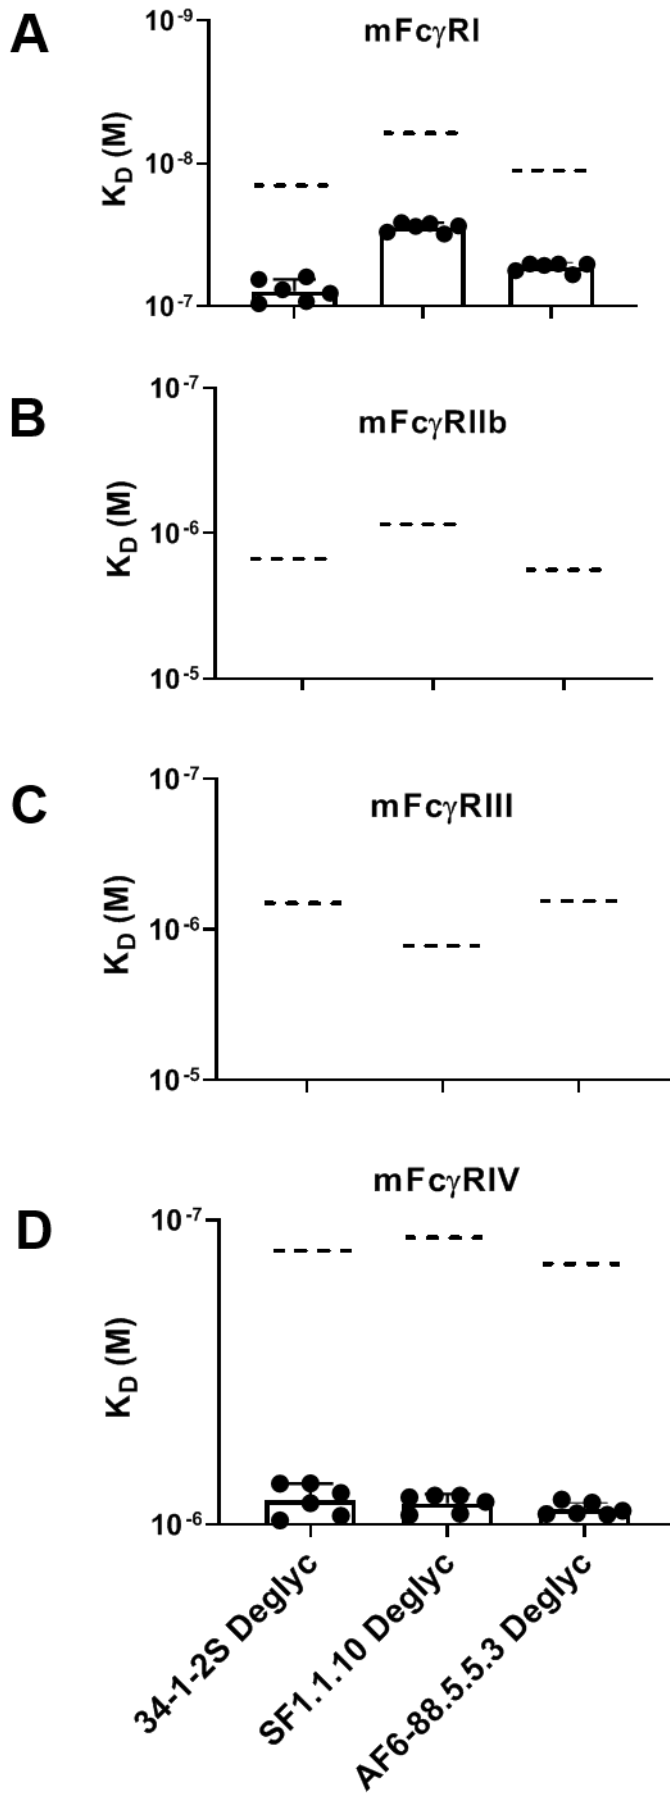

# Supp. Fig. 4

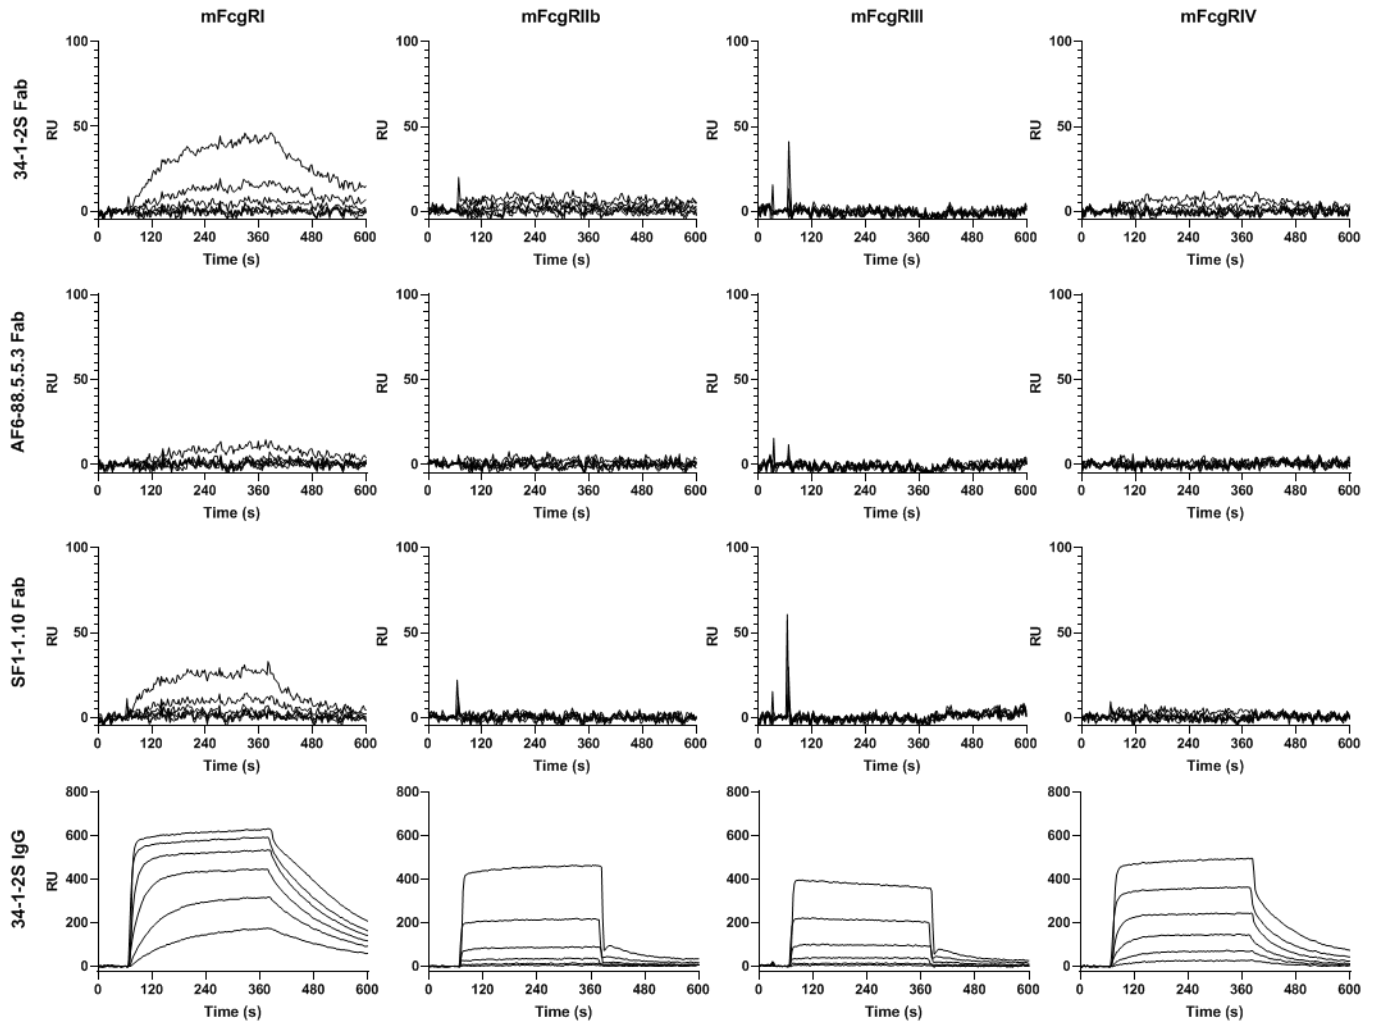

Supp. Fig. 5

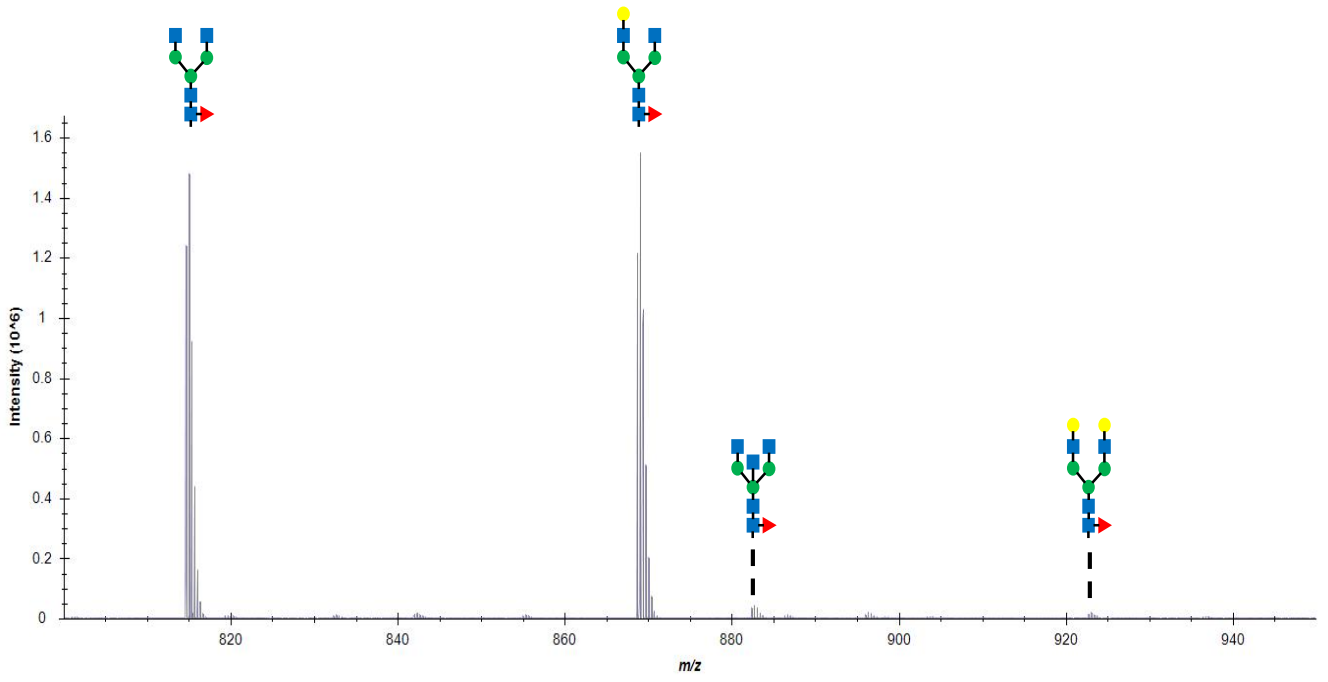

Supplement: advancesADV2020002291-suppl1.pdf [file advancesADV2020002291-suppl1.pdf]
